# Supplementary material for: A long-lived photoluminescent silver nanocluster-infused silver terephthalate metal organic framework with antibacterial and biofilm inhibition activity: a high functional resource
Source: Royal Society of Chemistry journal article supplement (doi:10.1039/d3tc01033c), 2023-01-01
Supplement: d3tc01033c1.pdf [file d3tc01033c1.pdf]

## Supporting Information

### Long Lived Photoluminescent Silver nanocluster infused Silver Terephthalate Metal Organic Framework with Antibacterial and Biofilm Inhibition Activity: A high functional resource

Liz Hannah George <sup>a</sup>, Sreedharan Prathapan <sup>b</sup>, Narayanapillai Manoj <sup>b</sup>, Prasanth Rathinam <sup>c†</sup>, Salbi Aadithya <sup>d</sup>, G. S. Sailaja\* <sup>a,d</sup>

<sup>a</sup>Department of Polymer Science and Rubber Technology, CUSAT, Cochin 682022 India,

<sup>b</sup>Department of Applied Chemistry, CUSAT, Cochin, 682022, India.

<sup>c</sup>Pushpagiri Institute of Medical Science and Research Centre, Thiruvalla, 689101, India

<sup>d</sup>Inter University Centre for Nanomaterials and Devices, Cochin, 682022, India.

\*Corresponding Authors:

Email: sailajags@cusat.ac.in

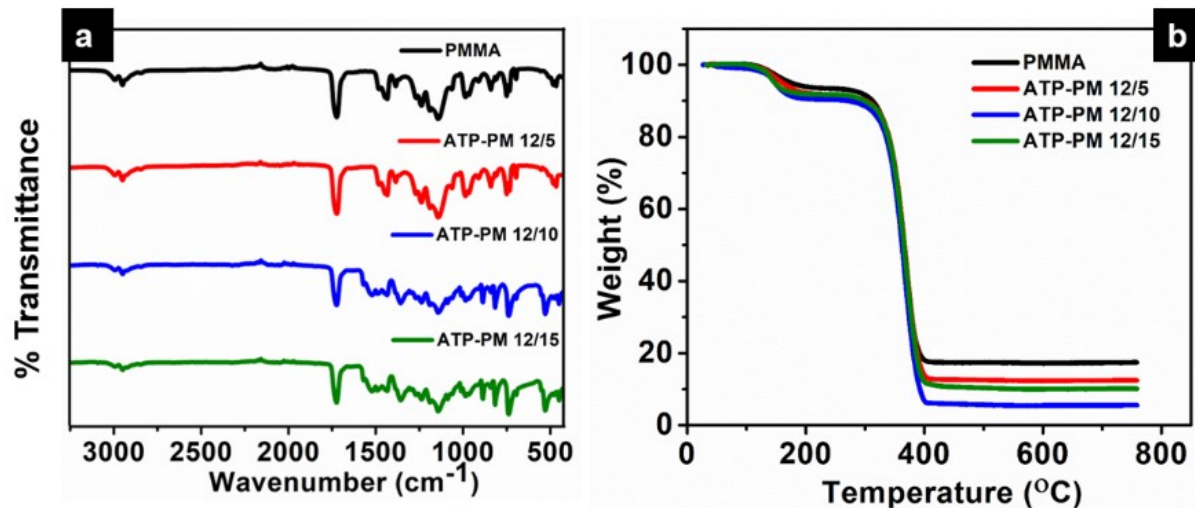

**Figure S1.** a) FT-IR spectra and b) TGA plot of PMMA, ATP-PM 12/5, ATP-PM 12/10, ATP-PM 12/15.
